# Supplementary material for: Highly versatile SPION encapsulated PLGA nanoparticles as photothermal ablators of cancer cells and as multimodal imaging agents
Source: Royal Society of Chemistry journal article supplement (doi:10.1039/c6bm00621c), 2017-01-01
Supplement: c6bm00621c1.pdf [file c6bm00621c1.pdf]

# Highly versatile SPIONs encapsulated PLGA nanoparticles as photothermal ablaters of cancer cells and as multimodal imaging agents

Balasubramanian Sivakumar<sup>1#</sup>, Ravindran Girija Aswathy<sup>1#§</sup>, Rebeca Romero-  
Aburto<sup>2</sup>, Trevor Mitcham<sup>3</sup>, Keith A. Mitchel<sup>4</sup>, Yutaka Nagaoka<sup>1</sup>, Richard R.  
Bouchard<sup>3</sup>, Pulickel M. Ajayan<sup>2</sup>, Toru Maekawa<sup>1</sup>, Dasappan Nair Sakthikumar<sup>1\*</sup>

## Supplementary Information

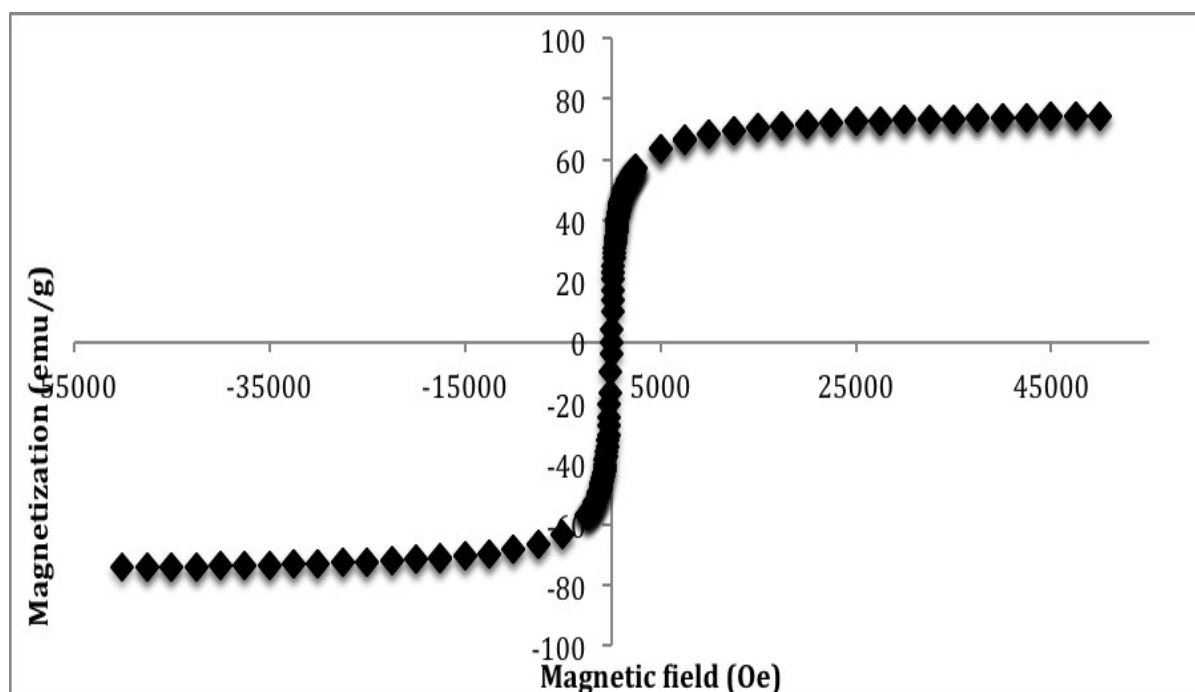

**Fig. S1** SQUID analysis of bare SPIONs.

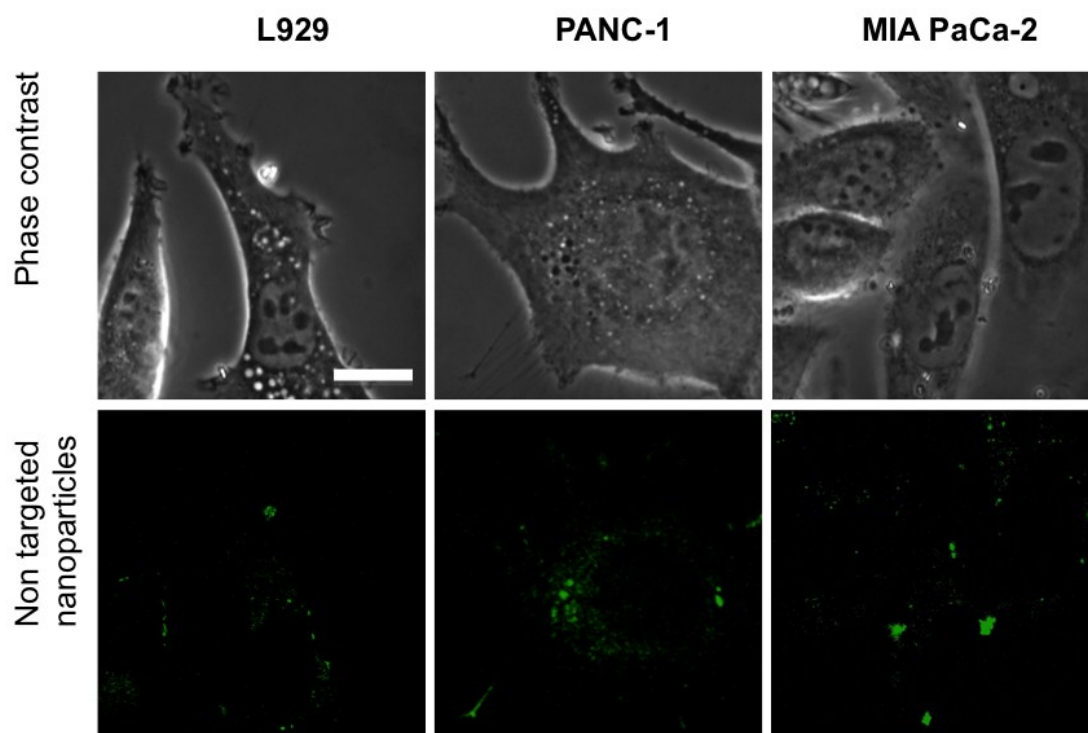

**Fig. S2** Optical imaging: Confocal laser scanning images of internalization of non-targeted nanocomposites in L929, PANC-1 and MIAPaCa-2 cell lines (scale 20  $\mu\text{m}$ ).

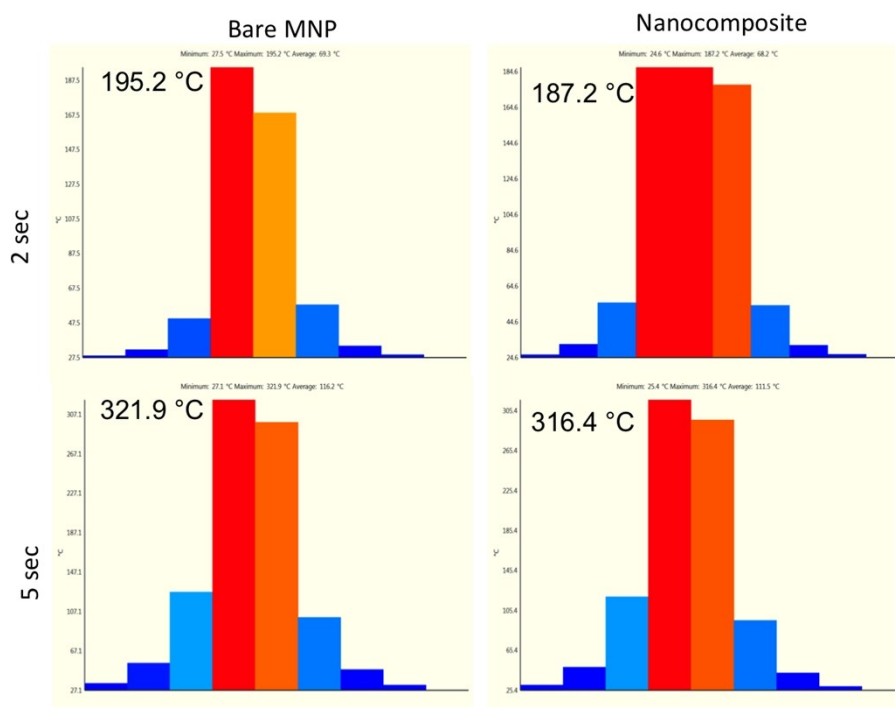

**Fig. S3** Temperature profile of powder samples of bare MNPs and nanocomposite

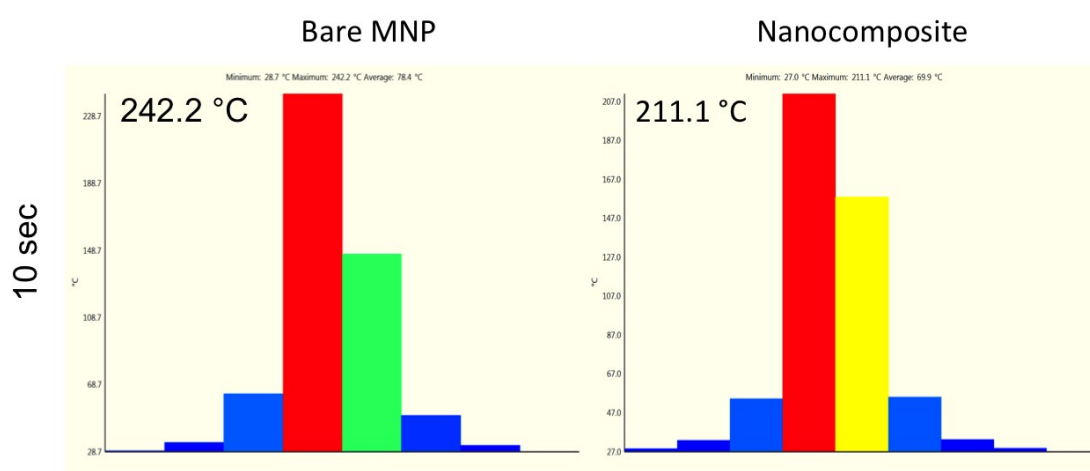

**Fig. S4** Temperature profile of samples in suspension; 200  $\mu$ L of bare MNPs and nanocomposite

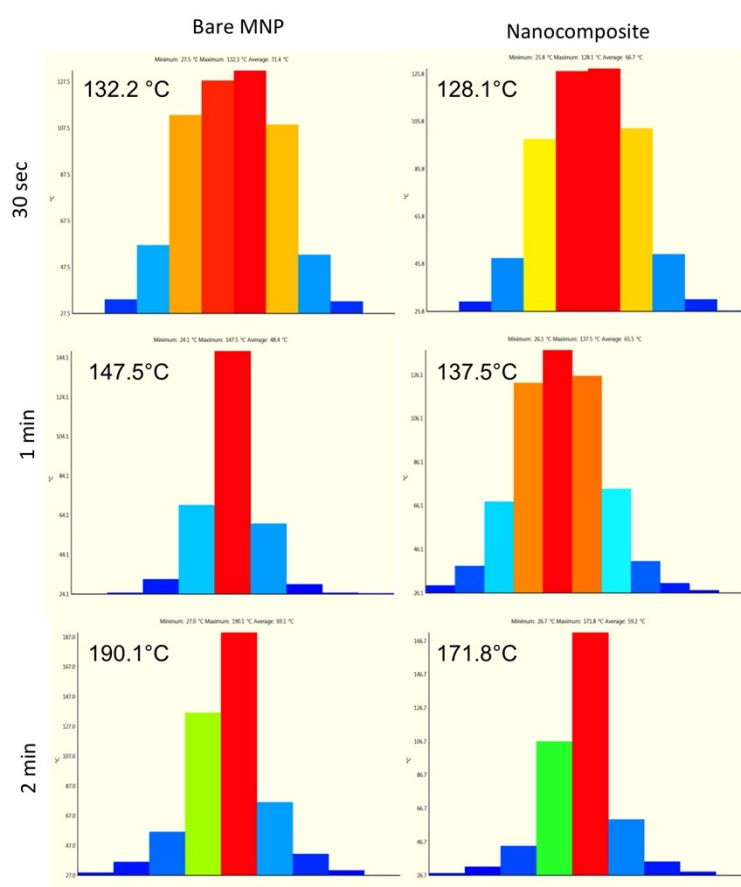

**Fig. S5** Temperature profile of samples in suspension; 100  $\mu$ L of bare MNPs and nanocomposite

| Concentration<br>(ug/mL) | T2<br>(msec) | R2=1/T2<br>(msec <sup>-1</sup> ) |
|--------------------------|--------------|----------------------------------|
| 150                      | 134.747      | 0.007421316                      |
| 300                      | 77.442       | 0.01291289                       |
| 450                      | 66.7109      | 0.014990054                      |
| Magnevist 469            | 271.2685     | 0.003686385                      |

Table T1: The R2 relativity of Nanocomposite.
